# Supplementary material for: Upconverting particles in near-infrared light-induced TiO2 photocatalysis: towards the optimal architecture of upconverter/photocatalyst systems
Source: Royal Society of Chemistry journal article supplement (doi:10.1039/d4ra04185b), 2024-01-01
Supplement: d4ra04185b1.pdf [file d4ra04185b1.pdf]

## Supporting information

# Upconverting particles in near-infrared light-induced TiO<sub>2</sub> photocatalysis: towards the optimal architecture of upconverter/photocatalyst systems

Paulina O'Callaghan,<sup>†</sup> Agnieszka Jarosz-Duda,<sup>†</sup> Joanna Kuncewicz,<sup>\*†</sup> Krzysztof Dzierżęga,<sup>‡</sup> and Wojciech Macyk<sup>\*†</sup>

<sup>†</sup> Faculty of Chemistry  
Jagiellonian University  
ul. Gronostajowa 2, 30-387 Kraków, Poland

<sup>‡</sup> Faculty of Physics, Astronomy and Applied Computer Science  
Jagiellonian University  
ul. Łojasiewicza 11, 30-348 Kraków, Poland

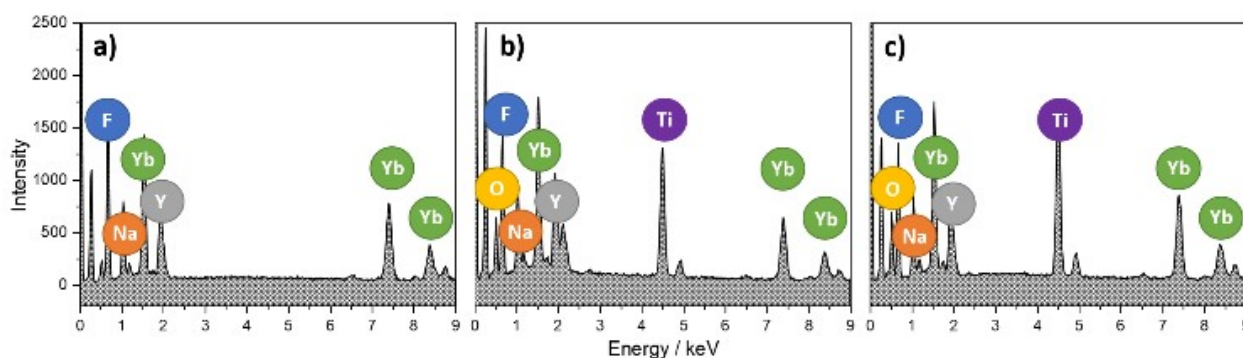

Figure S1. EDX spectra of (a) UCPs crystals, (b) UCPs mixed with P25, and (c) UCPs@TiO<sub>2</sub> material.

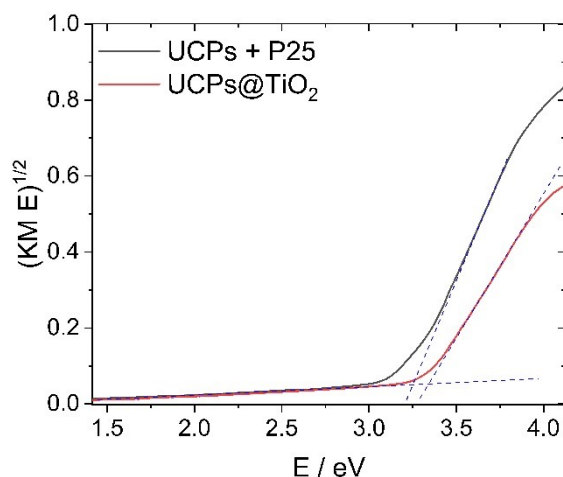

Figure S2. The Tauc plots of the UCPs mixed with P25 (UCPs+P25) and UCPs coated with titania layer (UCPs@TiO<sub>2</sub>). The estimated bandgaps of TiO<sub>2</sub> are for UCPs+P25 and UCPs@TiO<sub>2</sub>, 3.23 eV and 3.34 eV respectively.
